# Supplementary material for: Variation in brachiopod microstructure and isotope geochemistry under low-pH–ocean acidification conditions
Source: Copernicus journal article supplement (doi:10.5194/bg-16-617-2019), 2019-02-01
Supplement: Supplementary file 1 [file bg-16-617-2019-supplement.zip]

Archive with 3 entries (3 files):
- bg-16-617-2019-supplement-title-page.pdf
- Supplementary.docx
- Data sets.xlsx
