# Supplementary material for: Variation in brachiopod microstructure and isotope geochemistry under low-pH–ocean acidification conditions
Source: Copernicus journal article supplement (doi:10.5194/bg-16-617-2019), 2019-02-01
Supplement: Supplementary file 1 [file bg-16-617-2019-supplement.zip › bg-16-617-2019-supplement-title-page.pdf]

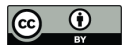

## *Supplement of*

# **Variation in brachiopod microstructure and isotope geochemistry under low-pH–ocean acidification conditions**

**Facheng Ye et al.**

*Correspondence to:* Facheng Ye (facheng.ye@unimi.it)

- [bg-16-617-2019-supplement-title-page.pdf](#)
- [Data sets.xlsx](#)
- [Supplementary.docx](#)

The copyright of individual parts of the supplement might differ from the CC BY 4.0 License.
